# Supplementary material for: Overcoming Activity/Stability Tradeoffs in CO Oxidation Catalysis by Pt/CeO2
Source: Research Square preprint supplement (doi:10.21203/rs.3.rs-5616848/v1), 2025-01-07
Supplement: Supplementary file 1 [file 8711a6ce8388b40b6128012f.pdf]

## Supporting Information

### Overcoming Activity/Stability Tradeoffs in CO Oxidation Catalysis by Pt/CeO<sub>2</sub>

Benjamin Bohigues,<sup>1</sup> Sergio Rojas-Buzo,<sup>1,2\*</sup> Davide Salusso,<sup>3</sup> Yu Xia,<sup>4</sup> Avelino Corma,<sup>1</sup> Silvia Bordiga,<sup>2</sup>

Mercedes Boronat,<sup>1</sup> Tom Willhammar,<sup>4</sup> Manuel Moliner,<sup>1</sup> Pedro Serna<sup>1\*</sup>

<sup>1</sup> Instituto de Tecnología Química, Universitat Politècnica de València-Consejo Superior de Investigaciones Científicas, Avenida de los Naranjos s/n, 46022 València, Spain

<sup>2</sup> Department of Chemistry and NIS Centre, University of Turin, Via Giuria 7, 10125 Turin, Italy

<sup>3</sup> European Synchrotron Radiation Facility, CS 40220, 38043 Grenoble Cedex 9, France

<sup>4</sup> Department of Materials and Environmental Chemistry, Stockholm University, SE-106 91 Stockholm, Sweden

\*Corresponding authors: E-mail addresses: [psername@itq.upv.es](mailto:psername@itq.upv.es); [sergio.rojasbuzo@unito.it](mailto:sergio.rojasbuzo@unito.it)

## 1.- Materials synthesis

### 1.1.- Preparation of the CeO<sub>2</sub>-Derived\_Pt-Imp

The as-synthesized UiO-66(Ce) was calcined at 450°C (5°C/min) for 4 h in flowing air to obtain the resulting CeO<sub>2</sub>-derived. Pt has been introduced by incipient wetness impregnation: 62 mg of an aqueous solution of chloroplatinic acid (8 wt.%) was added dropwise to 1 g of CeO<sub>2</sub>-derived. Then, the mixture was dried at 100°C for 4 h. The resulting CeO<sub>2</sub>-Derived\_Pt-Imp sample was calcined at 450°C (5°C/min) for 5 h in flowing air to obtain high Pt dispersions with a final Pt amount of 0.49 wt% Pt

**1.2.- Preparation of the supported Pt/CeO<sub>2</sub>-LS (low-surface).** This material has been prepared by incipient wetness impregnation: 96 mg of an aqueous solution of chloroplatinic acid (8 wt.%) was added dropwise to 1.5 g of CeO<sub>2</sub> (Sigma-Aldrich, 544841-25G, Lot #MKCK1143). Then, the mixture was dried at 100°C for 2 h. The resulting Pt/CeO<sub>2</sub>-LS sample was calcined at 450°C (5°C/min) for 5 h in flowing air to obtain high Pt dispersions with a resultant Pt content of 0.51 wt% Pt.

**1.3.- Preparation of the supported Pt/CeO<sub>2</sub>-HS (high-surface).** This material has been prepared by incipient wetness impregnation: 102 mg of an aqueous solution of chloroplatinic acid (8 wt.%) was added dropwise to 1.5 g of CeO<sub>2</sub> (Solvay, ITQ 3A, Lot # 0633984). Then, the mixture was dried at 100°C for 4 h. The resulting Pt/CeO<sub>2</sub>-HS sample was calcined at 450°C (5°C/min) for 5 h in flowing air to obtain high Pt dispersions with a final Pt amount of 0.54 wt% Pt.

## 2.- Post-synthetic activations in CO

The previous calcined Pt/CeO<sub>2</sub>-X (X = HS/LS) samples were reduced at 300°C for 40 min with 50 mL/min (4% CO and balanced with N<sub>2</sub>). The resultant reduced-samples were named as Pt/CeO<sub>2</sub>-X-CO. For the catalytic tests and DRIFT-based characterization, Pt/CeO<sub>2</sub>-X were calcined *in situ* directly before the CO-treatment.

## Supplementary Figures

**Figure S1.** Physicochemical properties of Pt/CeO<sub>2</sub>-HS sample. **a)** Powder XRD pattern. **b)** HAADF-STEM image on zone axis [111]. **c)** N<sub>2</sub> adsorption and desorption isotherms. **d)** TEM image and **e)** HR-FESEM image.

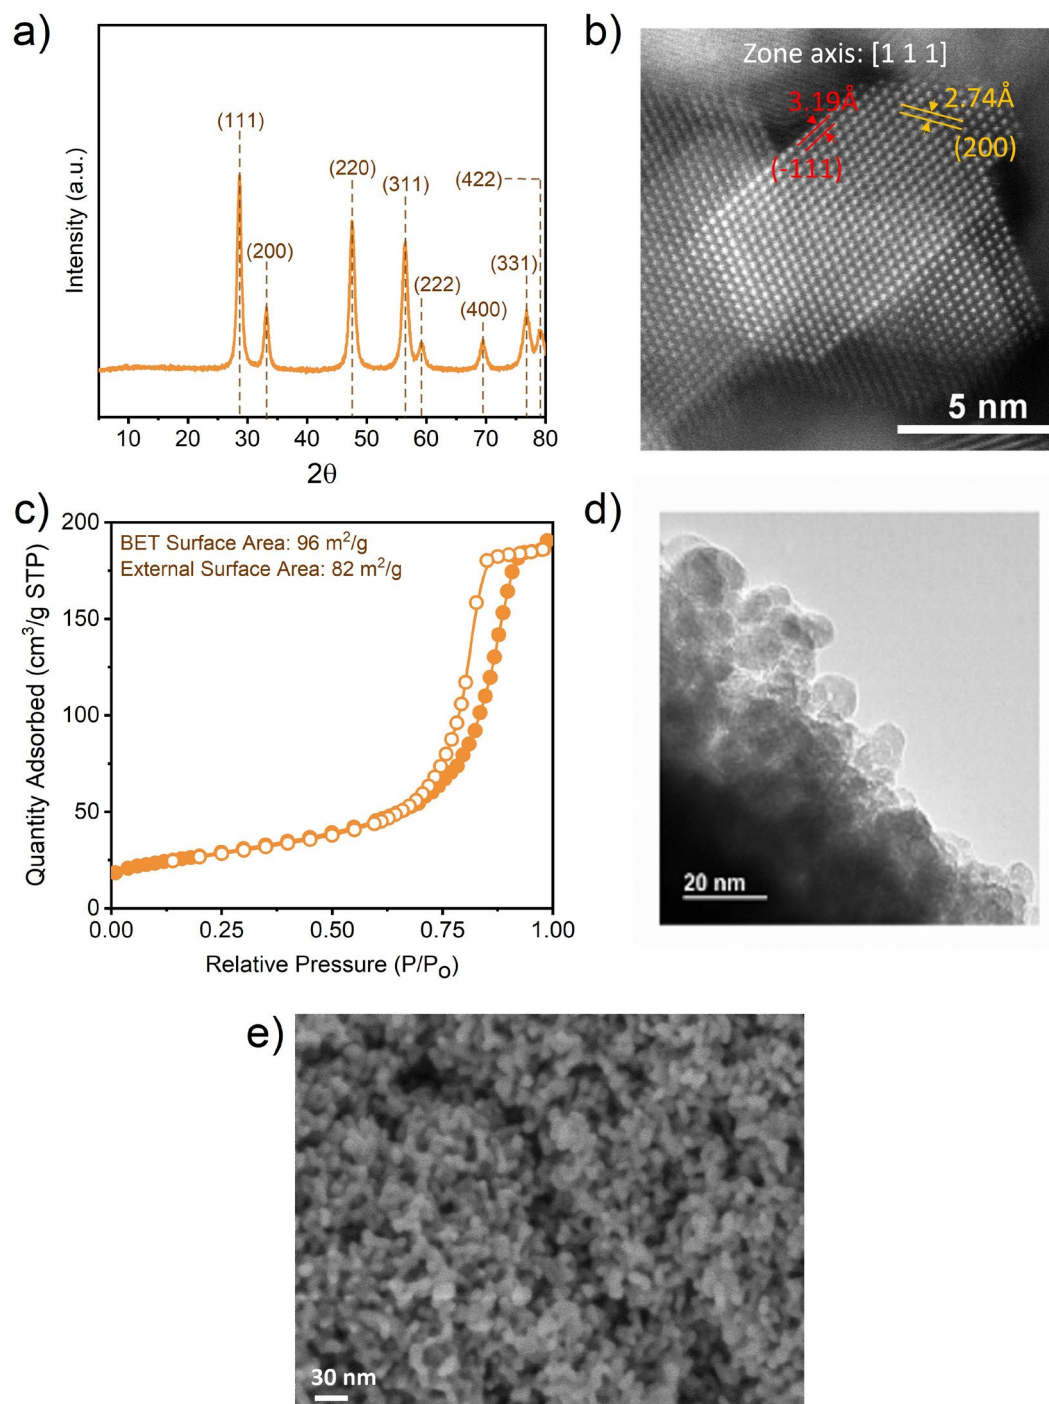

**Figure S2.** DRIFT spectra of CO adsorbed at room temperature of Pt/CeO<sub>2</sub>-HS after calcination in O<sub>2</sub> at 450°C (dark orange) and after consecutive reduction in CO at 300°C (light orange).

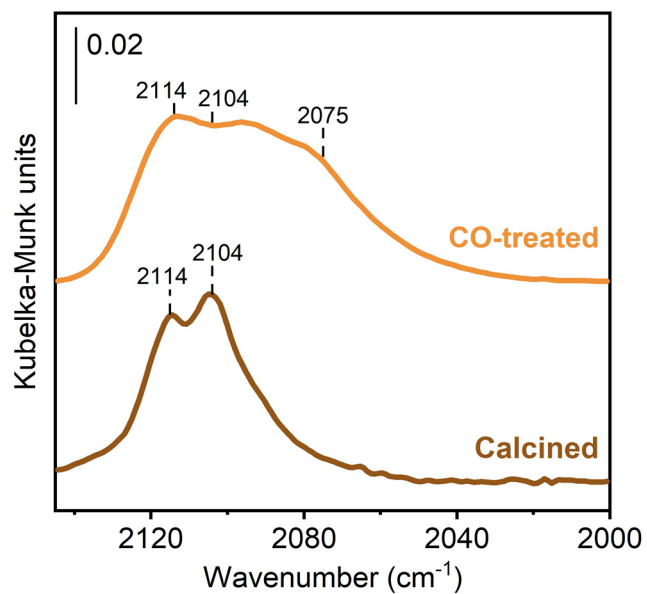

**Figure S3** Experimental spectra (black line) and best fit curve (red line) of a,c,e) Pt/CeO<sub>2</sub>-HS and b,d,f) Pt/CeO<sub>2</sub>-derived in the a,b)EXAFS, c,d) FT-EXAFS magnitude and e,f) imaginary parts.

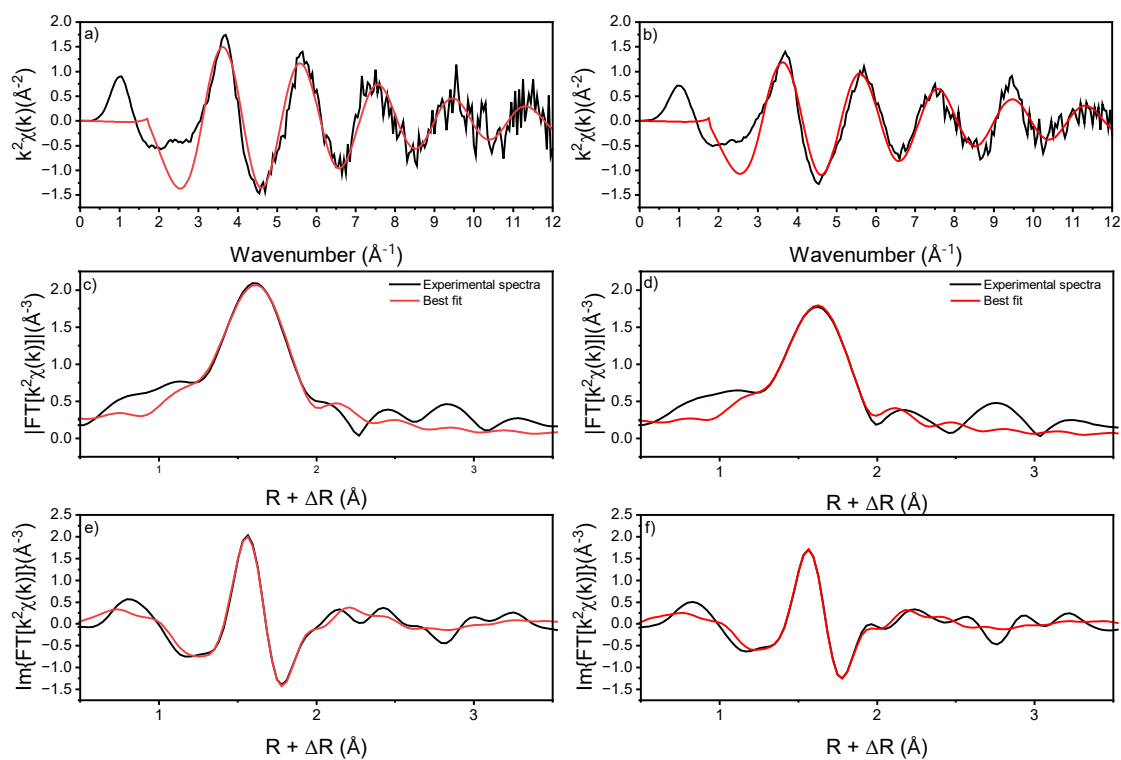

**Figure S4.** Catalysts aged at 300°C. Light-off conversion curves for the CO oxidation reaction for Pt/CeO<sub>2</sub>-HS (orange, **a**), Pt/CeO<sub>2</sub>-LS (grey, **b**), 3.5%Pt/CeO<sub>2</sub>-HS (red, **c**) and Pt/CeO<sub>2</sub>-Derived (blue, **d**) in their calcined forms (full symbol), after CO activation (empty symbol) and followed by a subsequent cycle after reaching 500°C (half full symbol). Reaction conditions: 1.2% CO, 9.7% O<sub>2</sub>, 25 ml/min, normalized Pt content and WHSV = 5000 L/g<sub>Pt</sub>·h.

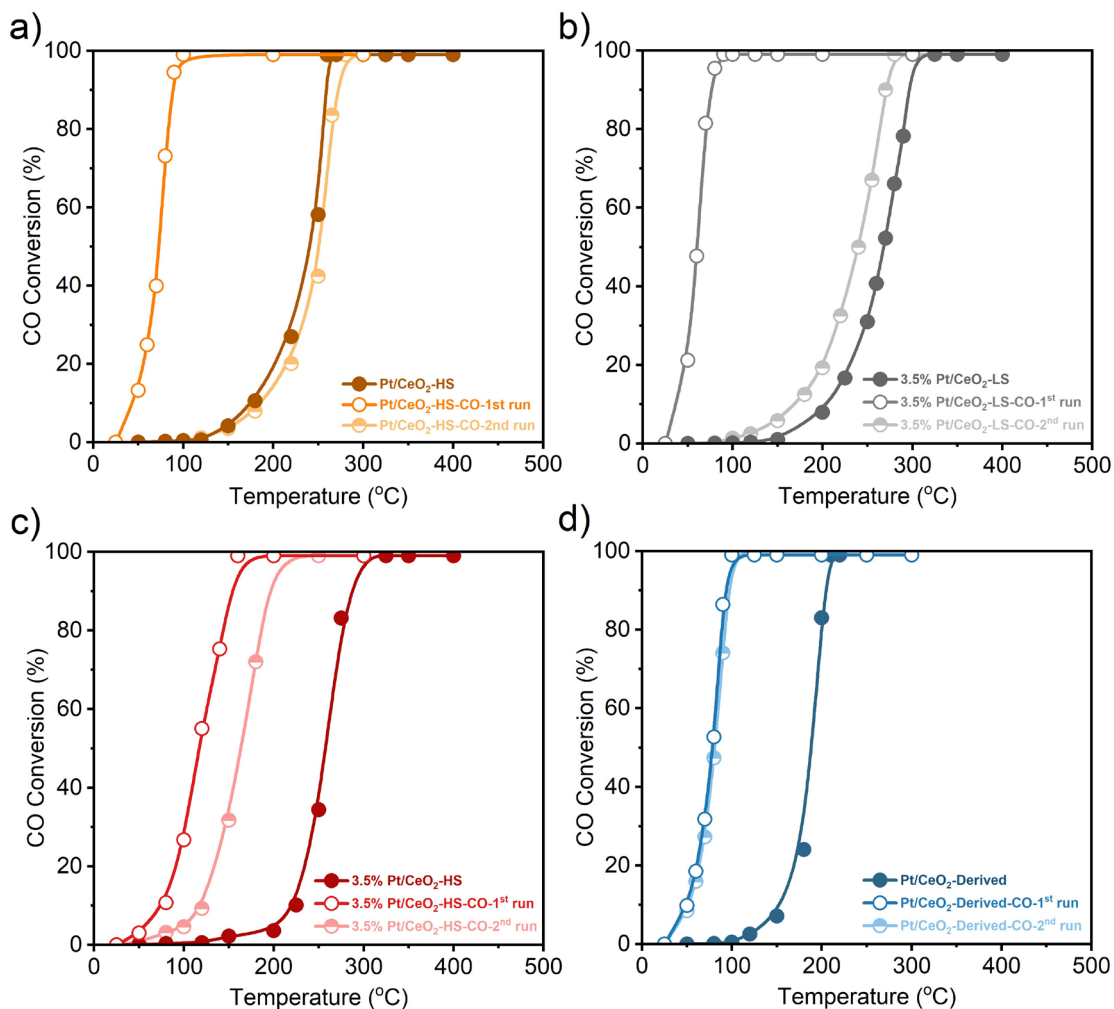

**Figure S5.** Physicochemical properties of Pt/CeO<sub>2</sub>-LS sample. **a)** Powder XRD pattern. **b)** TEM image. **c)** N<sub>2</sub> adsorption and desorption isotherms and **d)** HR-FESEM image.

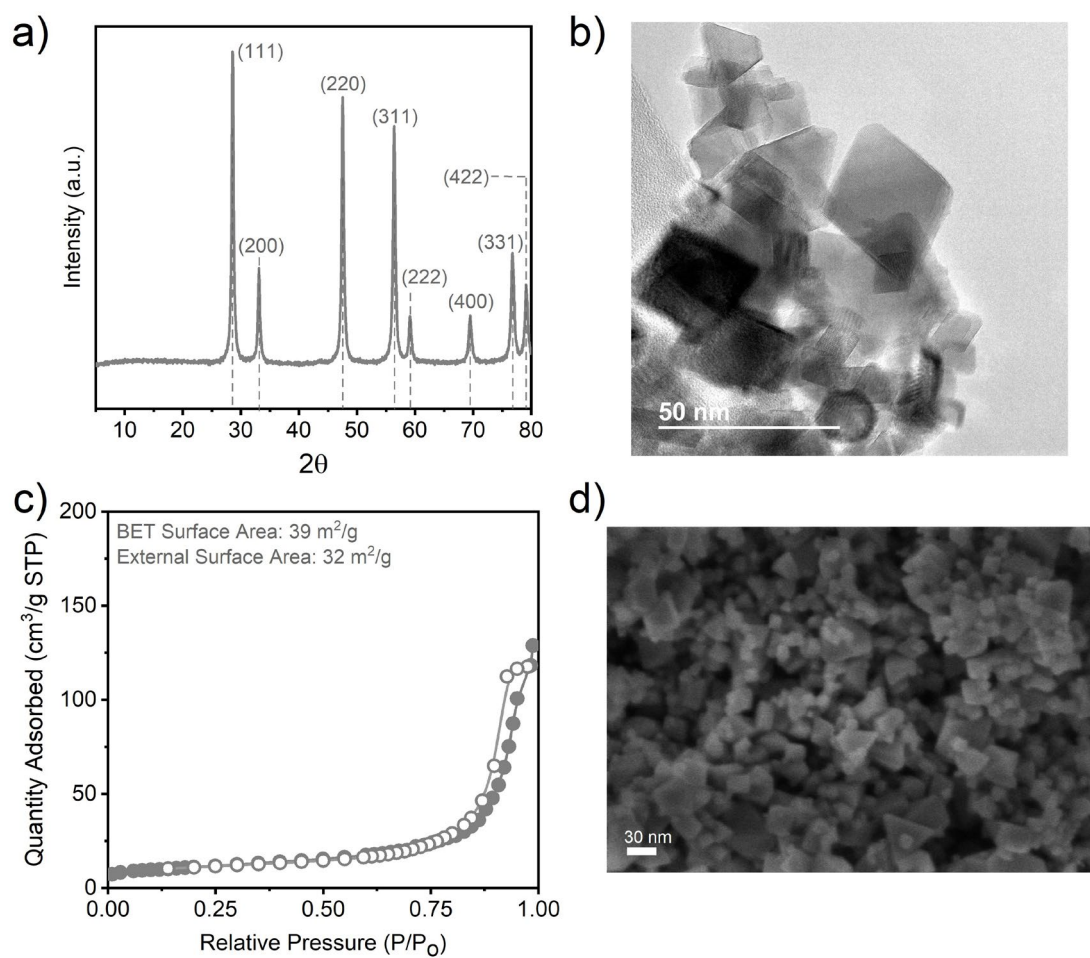

**Figure S6.** Pt/CeO<sub>2</sub>-LS aged at 500°C. Light-off conversion curves for the CO oxidation reaction for the calcined Pt/CeO<sub>2</sub>-LS material (full symbol), after CO activation (empty symbol) followed by a subsequent cycle after reaching 500°C (half full symbol). Reaction conditions: 1.2% CO, 9.7% O<sub>2</sub>, 25 ml/min, normalized Pt content and WHSV = 5000 L/g<sub>Pt</sub>·h.

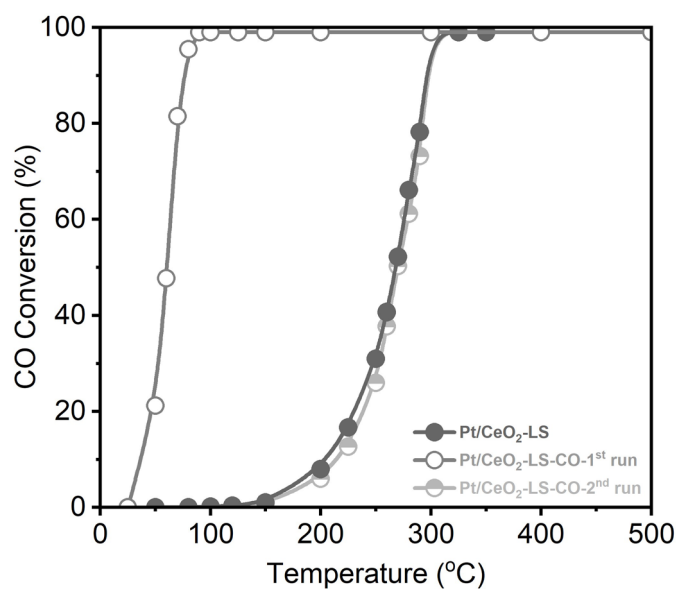



**Figure S7.** Physicochemical properties of Pt/CeO<sub>2</sub>-Derived sample. **a)** Powder XRD pattern. **b)** HAADF-STEM image. **c)** N<sub>2</sub> adsorption and desorption isotherms. **d)** TEM image and **e)** HR-FESEM image.

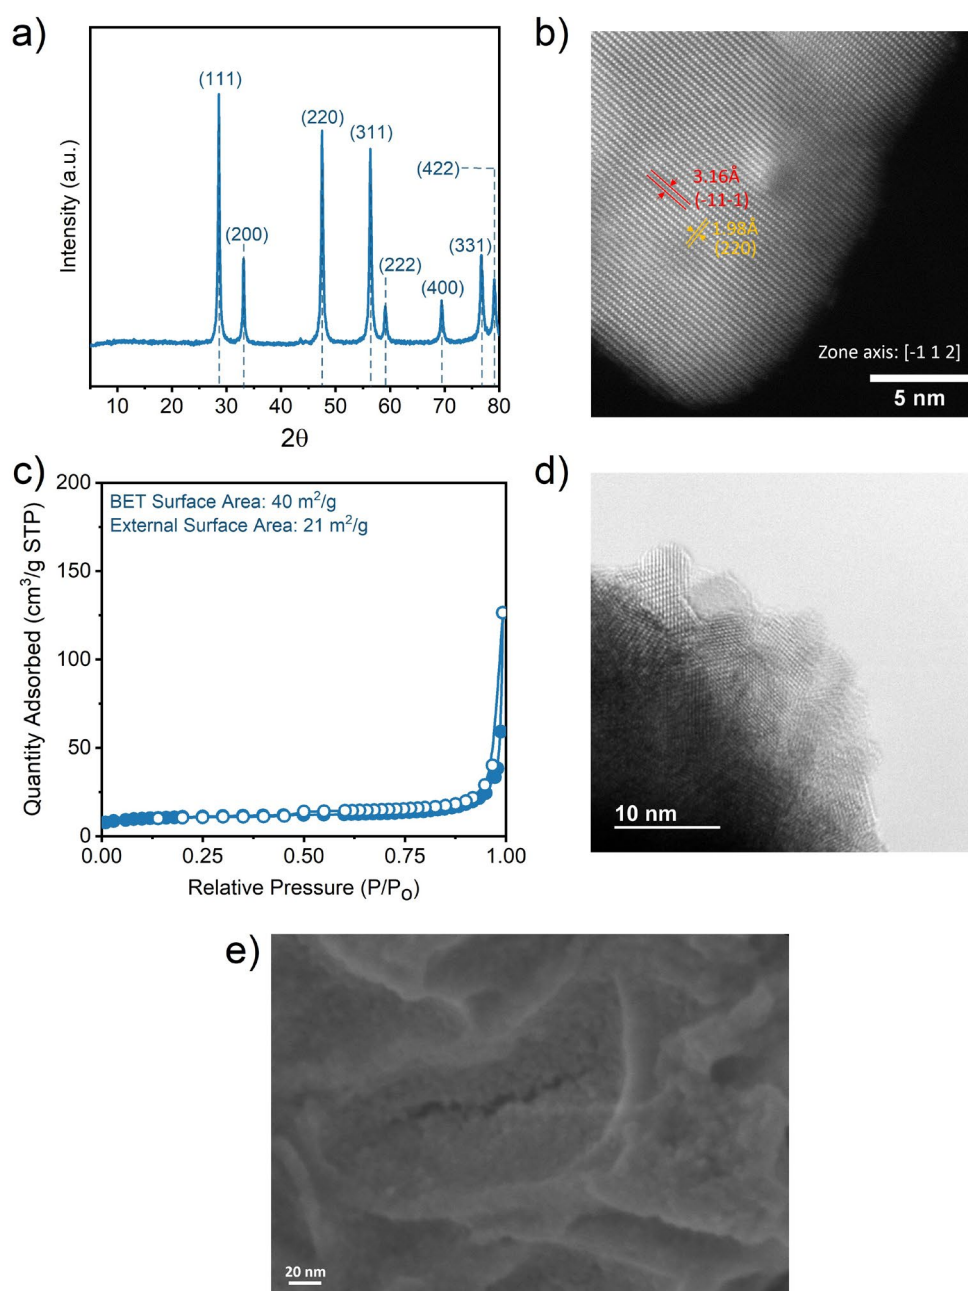

**Figure S8.** DRIFT spectra of CO adsorbed at room temperature of Pt/CeO<sub>2</sub>-Derived after calcination in O<sub>2</sub> at 450°C (dark blue) and after consecutive reduction in CO at 300°C (light blue).

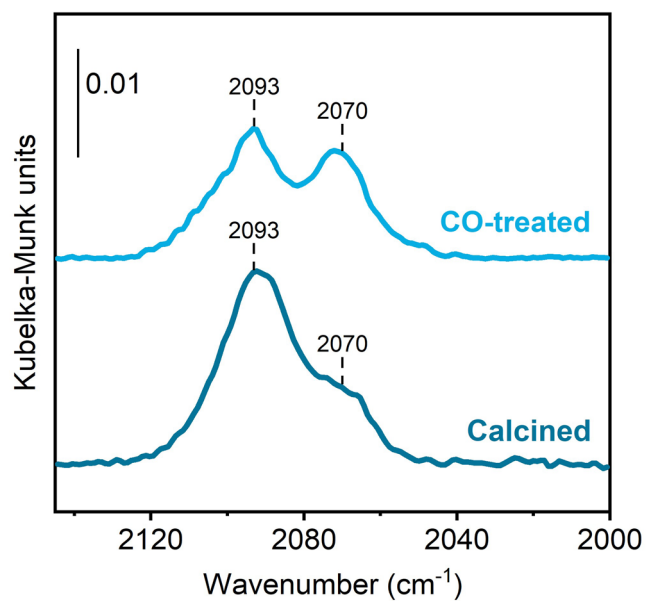

**Figure S9.** HAADF-STEM images of Pt/CeO<sub>2</sub>-Derived directly after its calcination treatment at 450°C.

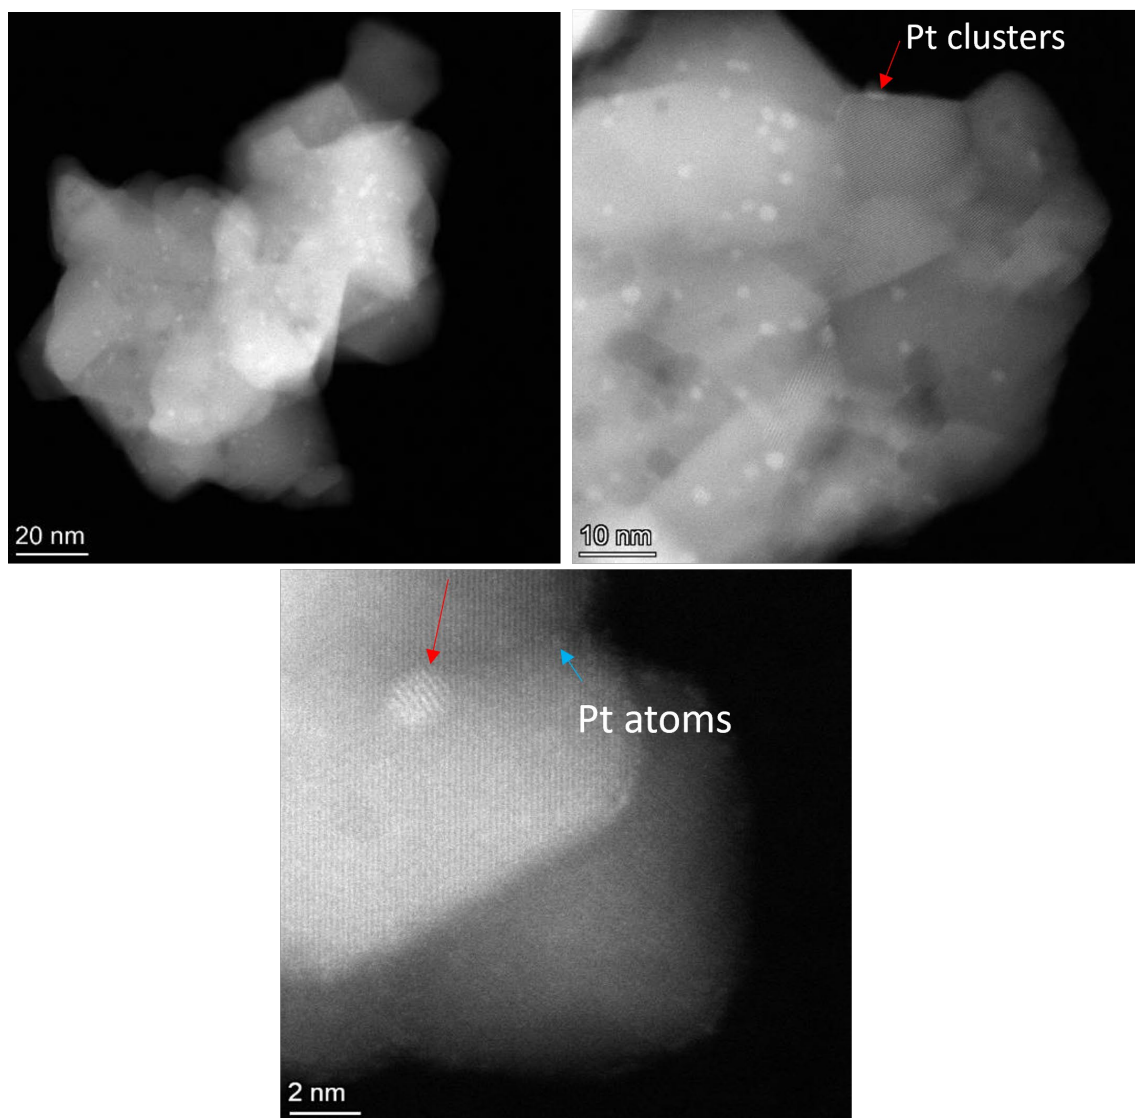

**Figure S10.** *d*-spacing of large Pt particles at calcined (A) and reduced (B) Pt/CeO<sub>2</sub>-Derived sample (CO-treatment at 300°C).

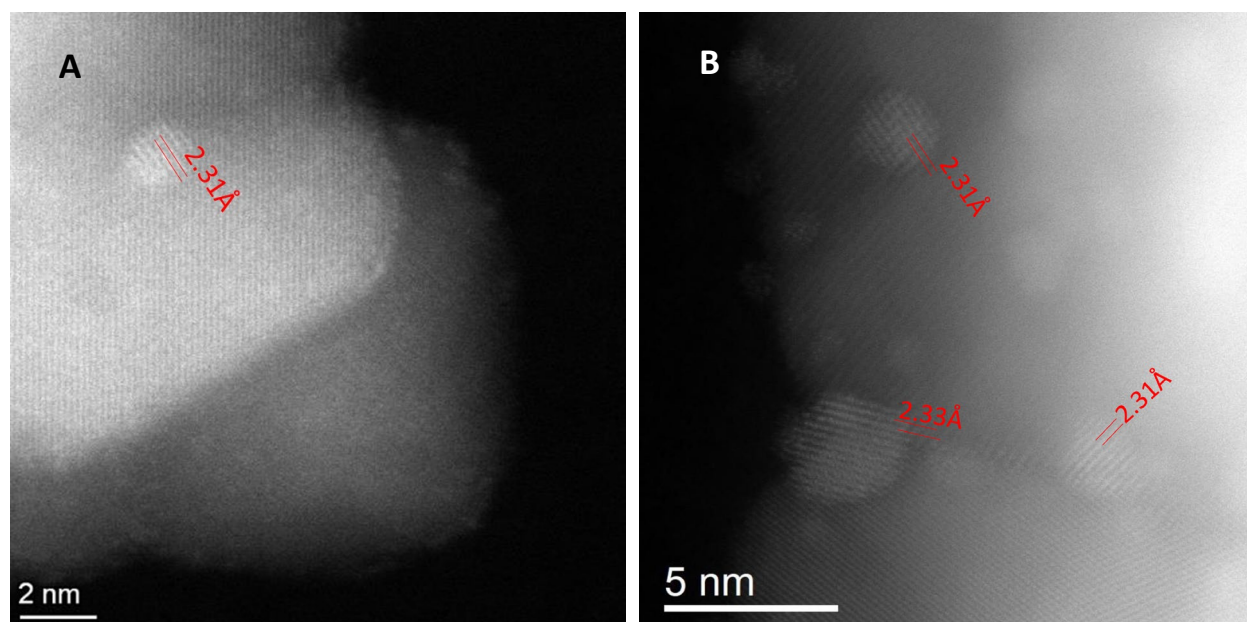

**Figure S11.** Light-off conversion curves for the CO oxidation reaction for Pt/CeO<sub>2</sub>-Derived catalyst using higher WHSV, in its calcined form (full symbol), after CO activation (empty symbol) and followed by a subsequent cycle after reaching 500°C (half full symbol). Reaction conditions: 1.2% CO, 9.7% O<sub>2</sub>, 25 ml/min, normalized Pt content and WHSV = 20000 L/g<sub>Pt</sub>·h.

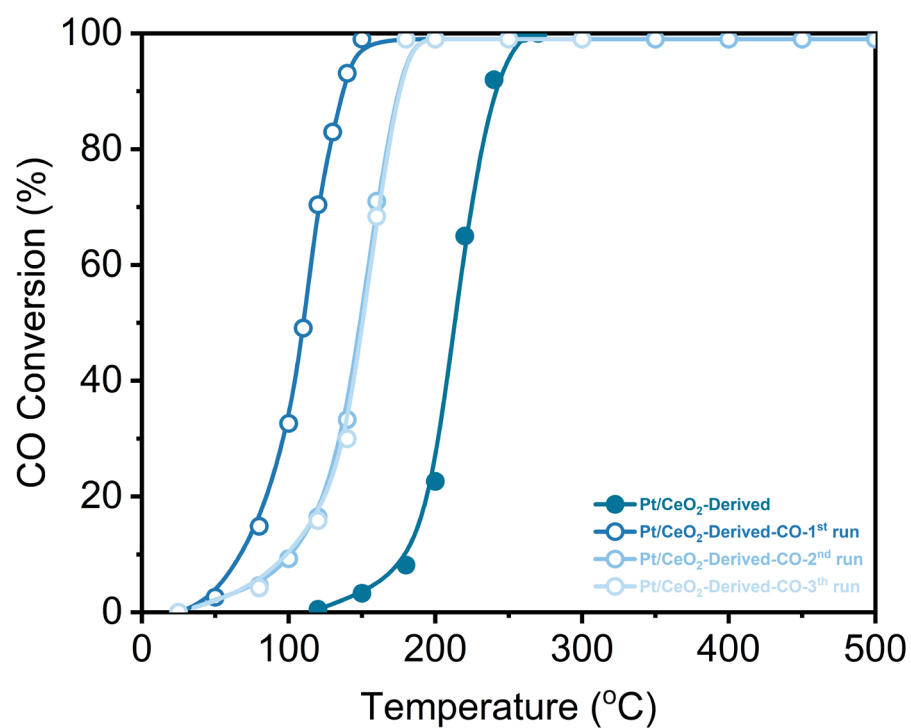

**Figure S12.** Light-off catalytic tests for the CO oxidation reaction using the CO-treated Pt/CeO<sub>2</sub>-Derived sample in O<sub>2</sub>-rich conditions (25 ml/min, containing 1.2 % CO, 9.7 % O<sub>2</sub>, balanced with N<sub>2</sub>) from 50°C to 300°C and held at 300°C for 1 h using a WHSV = 5000 L/g<sub>Pt</sub>·h. After complete reaction in O<sub>2</sub>-rich conditions, the Pt/CeO<sub>2</sub>-Derived material was treated with CO (4% CO, balanced with N<sub>2</sub>) at 300°C (Pt/CeO<sub>2</sub>-Derived-CO), and tested for two consecutive light-off catalytic cycles. Afterwards, the catalyst was treated in air flow (50 ml/min) at 300°C and held for 1 h (Pt/CeO<sub>2</sub>-Derived-CO-300 O<sub>2</sub>), and tested for three consecutive light-off catalytic cycles. Finally, the catalyst was treated in air flow (50 ml/min) for 1 h at 500°C (Pt/CeO<sub>2</sub>-Derived-CO-500 O<sub>2</sub>), and tested for three consecutive light-off catalytic cycles.

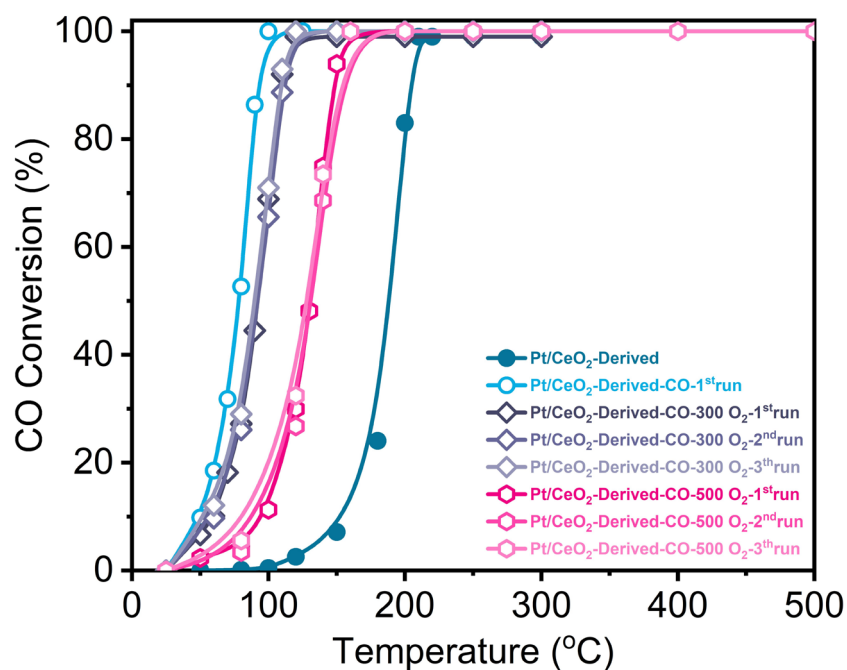

**Figure S13.** Comparison of the catalytic performance for the CO oxidation reaction using Pt/CeO<sub>2</sub>-Derived [obtained by direct calcination of the Pt/UiO-66(Ce)] and CeO<sub>2</sub>-Derived\_Pt-Imp [obtained by calcination of the UiO-66(Ce) followed by impregnation of Pt]. **a)** Light-off catalytic cycles for both Pt-containing MOF-derived materials in their fresh forms and after CO activation. **b)** Time-on-stream performance for Pt-containing MOF-derived materials in isothermal CO oxidation experiments at 120°C. Reaction conditions: 1.2% CO, 9.7% O<sub>2</sub>, 25 ml/min, normalized Pt content and WHSV = 5000 L/g<sub>Pt</sub>·h.

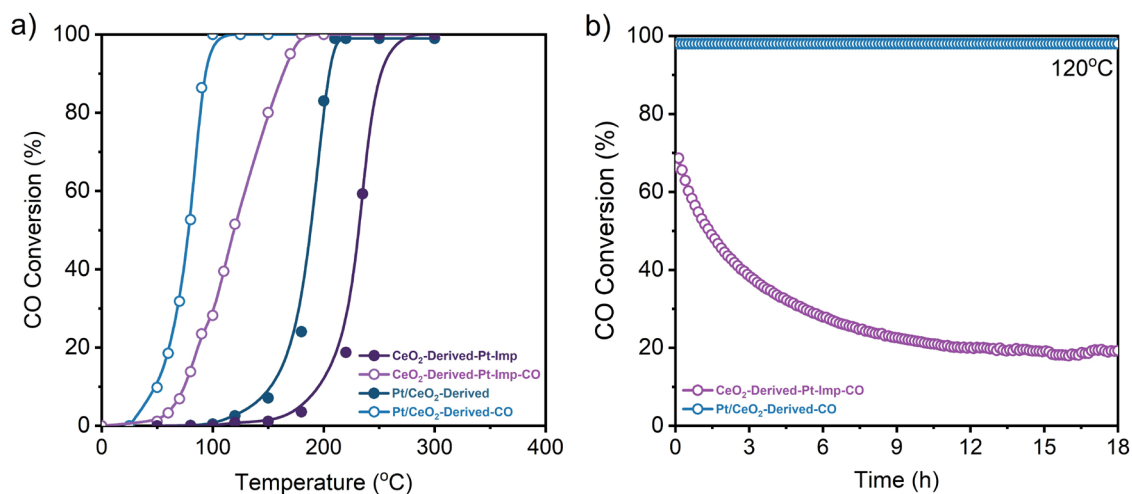

**Figure S14.** HAADF-STEM images of Pt/CeO<sub>2</sub>-LS after reduction in CO at 300°C.

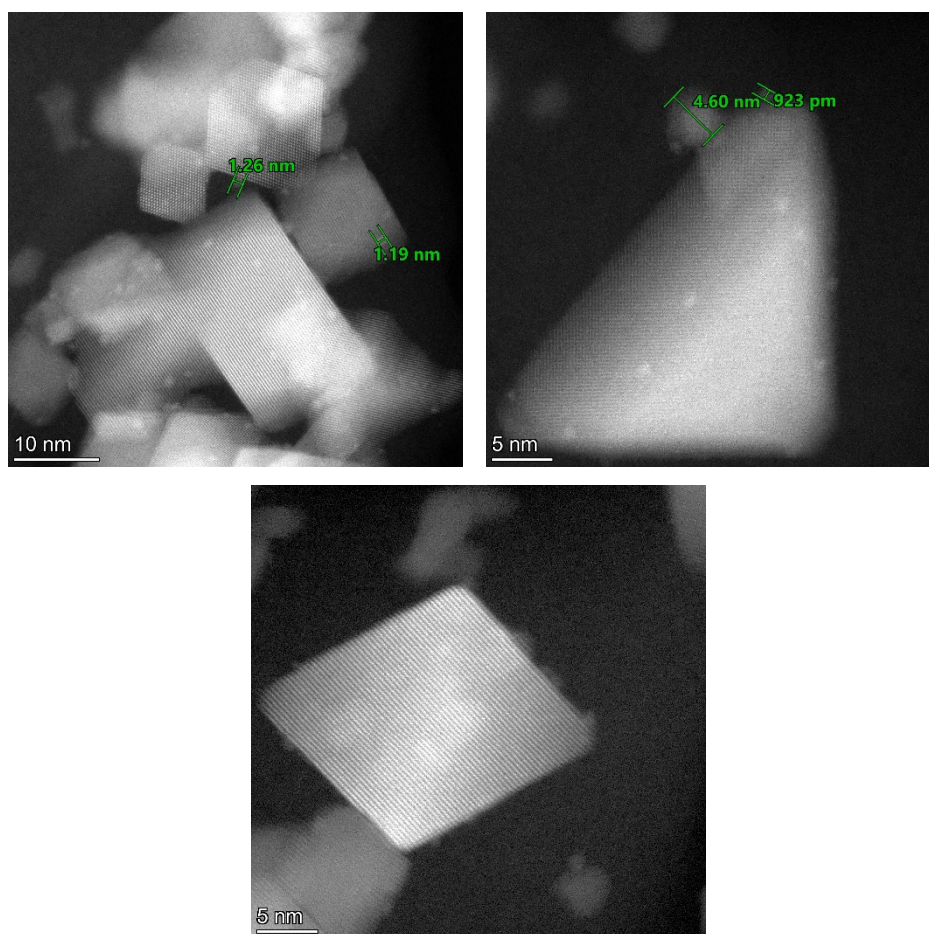



**Figure S15.** HAADF-STEM images of CeO<sub>2</sub>-Derived-Pt-Imp after reduction in CO at 300°C.

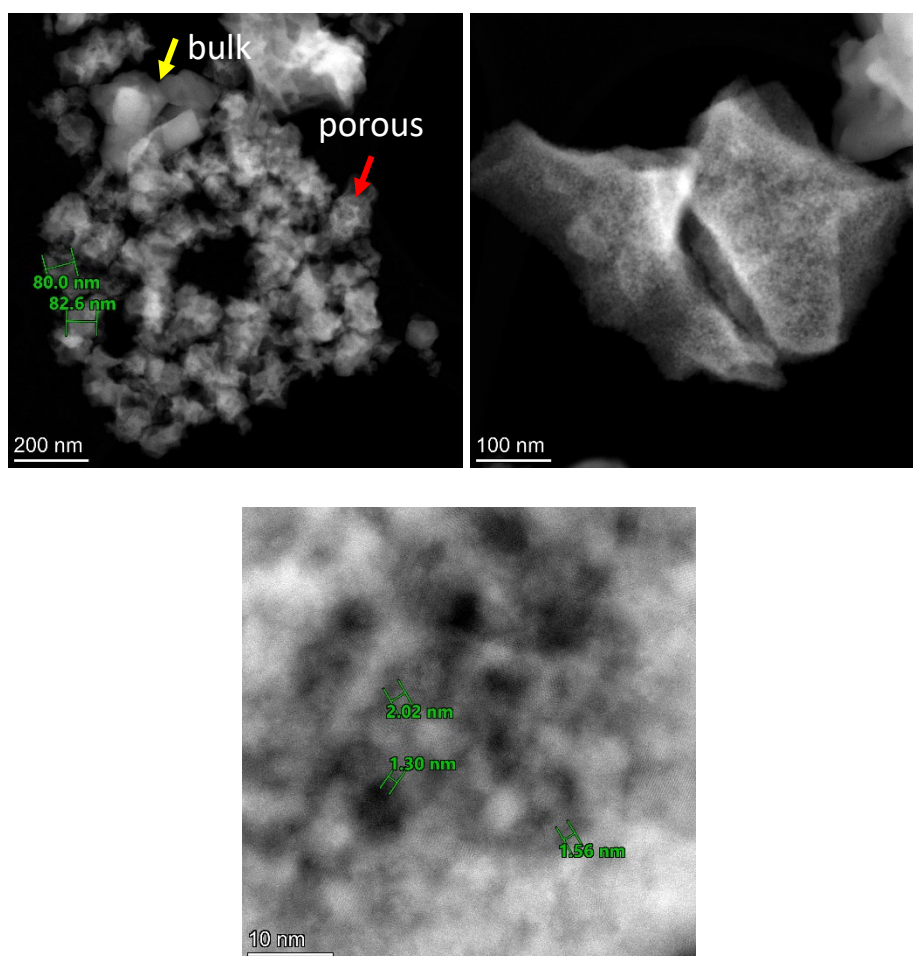

**Figure S16.** N<sub>2</sub> physisorption isotherms at liquid nitrogen temperature for samples Pt/CeO<sub>2</sub>-Derived and CeO<sub>2</sub>-Derived. The former includes Pt on the parent MOF at the moment of its calcination in air at 450°C, whereas the latter corresponds to calcination of the MOF under the same conditions prior to deposition of the Pt.

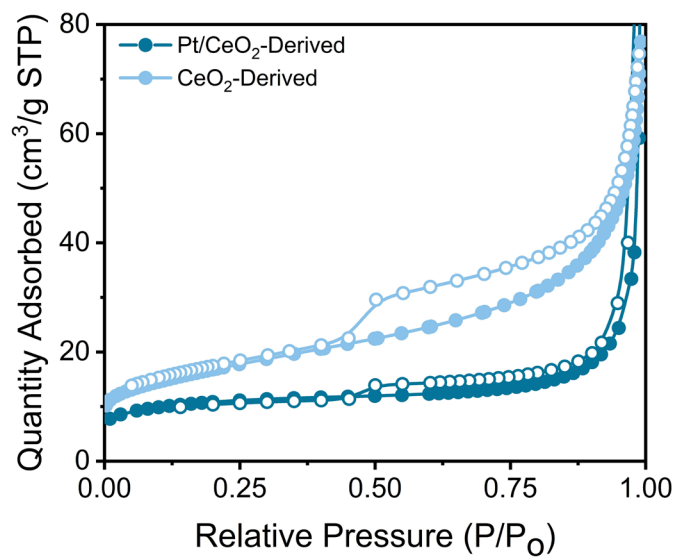

**Figure S17. a)** Isolated  $\text{Pt}_{10}$  clusters of diverse morphology and side view of the  $\text{CeO}_2\text{-V}$  surface model employed in the periodic DFT study. Optimized geometries of these  $\text{Pt}_{10}$  clusters supported on **b)**  $\text{CeO}_2(111)$  and **c)**  $\text{CeO}_2\text{-V}$  surface models. Ce, O and Pt atoms are depicted as gray, red and blue balls.

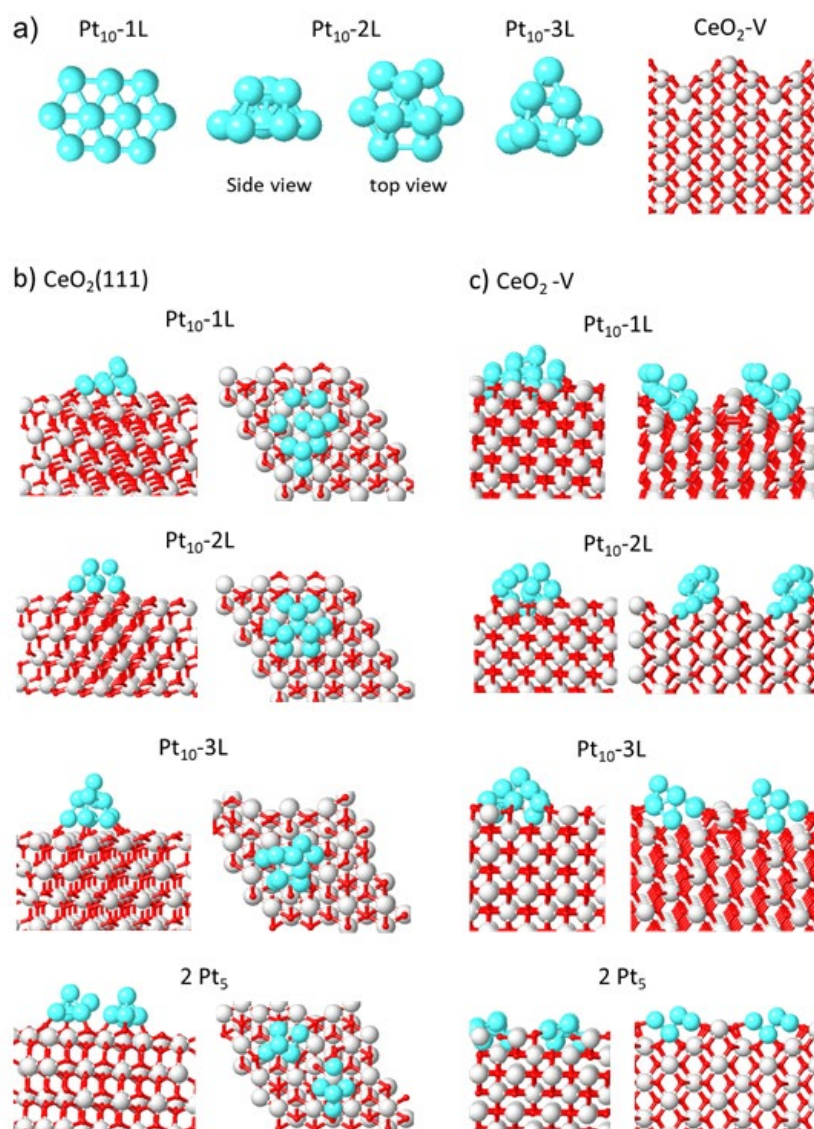

**Figure S18.** Optimized structures of partly oxidized  $\text{Pt}_{10}\text{O}_x$  clusters supported on **a)**  $\text{CeO}_2(111)$  and **b)**  $\text{CeO}_2\text{-V}$  surface models obtained from periodic DFT calculations. Ce, O and Pt atoms are depicted as grey, red and blue balls.

**a)  $\text{CeO}_2(111)$**

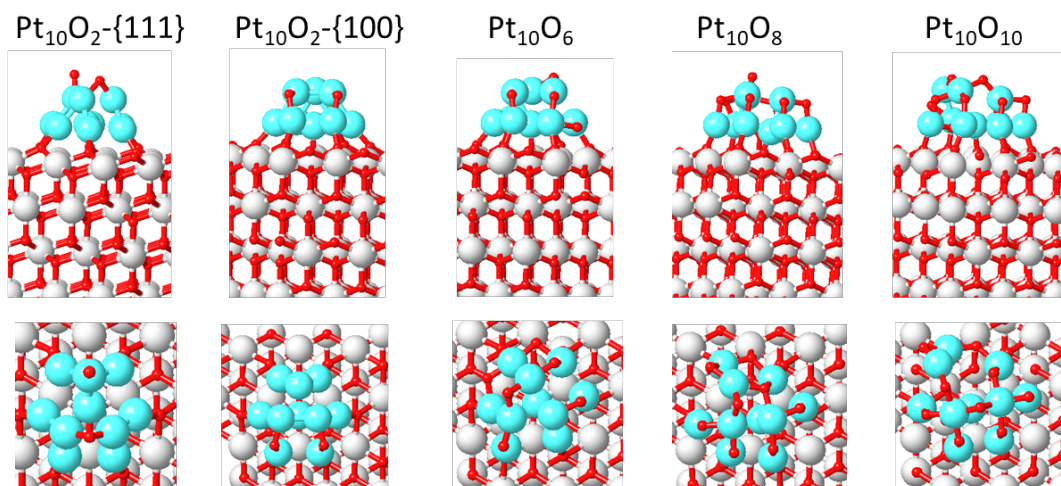

**b)  $\text{CeO}_2\text{-V}$**

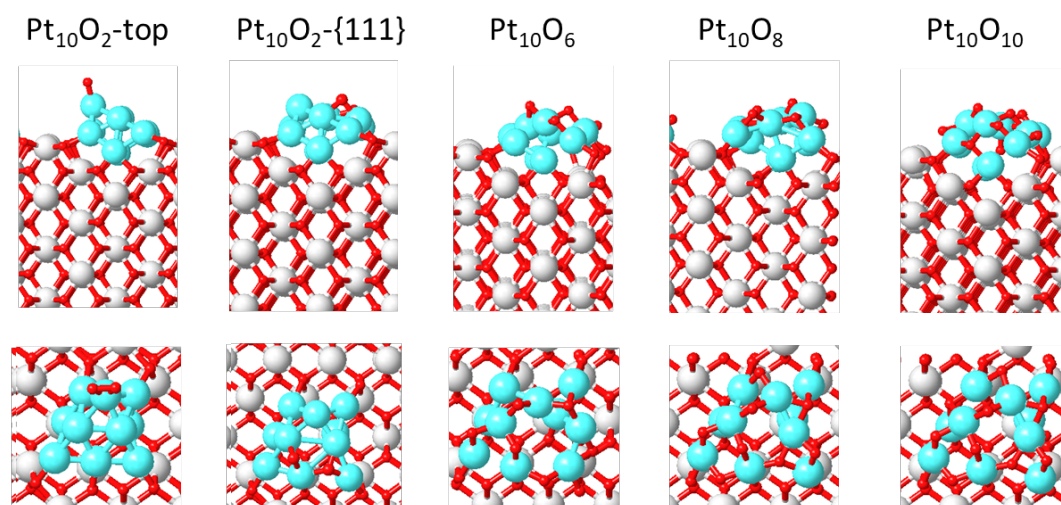

**Figure S19.** a) Imaginary components of the  $k^2$ -weighted FT-EXAFS spectra and b) experimental  $k^2$ -weighted EXAFS spectra obtained for Pt/CeO<sub>2</sub>-Derived (blue lines) and Pt/CeO<sub>2</sub>-HS (orange lines) after various sequential thermal treatments (calcination in O<sub>2</sub> at 450°C, reduction in CO at 300°C, and reaction with O<sub>2</sub> and CO at 500°C). Pt and PtO<sub>2</sub> spectra are reported for clarity with gray and black lines, respectively.

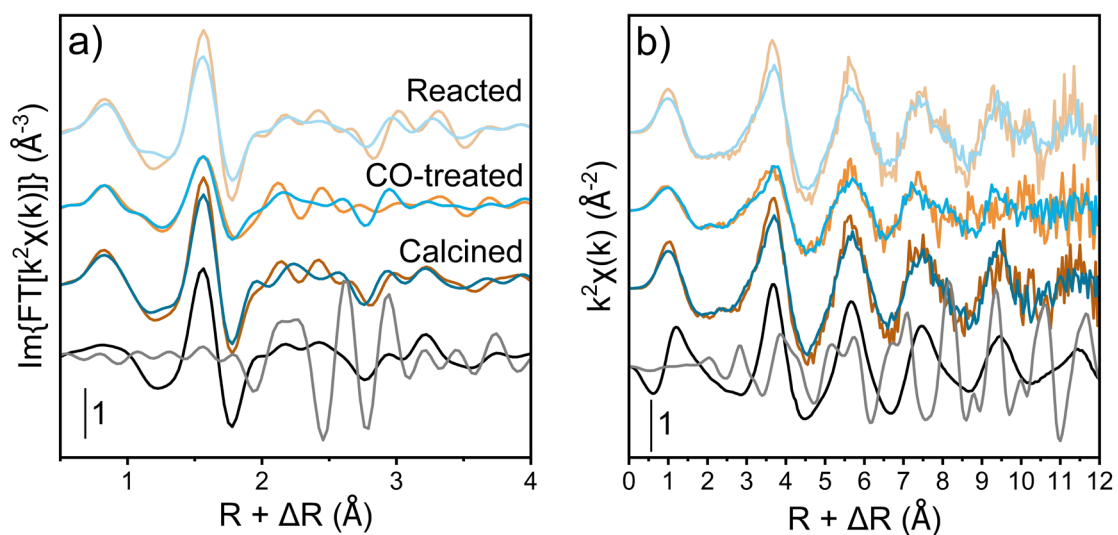

## Supplementary Tables

**Table S1:** Physical-chemical properties of the CeO<sub>2</sub> supports and the final Pt/CeO<sub>2</sub> materials

|                                           | Pt (wt%) | BET surface area (m <sup>2</sup> /g) |
|-------------------------------------------|----------|--------------------------------------|
| Pt/UiO-66(Ce)                             | 0.18     | 1071                                 |
| CeO <sub>2</sub> -Derived                 | -        | 59                                   |
| Pt/CeO <sub>2</sub> -Derived <sup>1</sup> | 0.46     | 39                                   |
| CeO <sub>2</sub> -HS                      | -        | 110                                  |
| Pt/CeO <sub>2</sub> -HS                   | 0.54     | 96                                   |
| CeO <sub>2</sub> -LS                      | -        | 40                                   |
| Pt/CeO <sub>2</sub> -LS                   | 0.51     | 38                                   |
| CeO <sub>2</sub> -Derived                 | -        | 59                                   |

<sup>1</sup> Pt impregnated on the MOF, then calcined in air at 450°C; <sup>2</sup> CeO<sub>2</sub> product that results from calcination of a Pt-free MOF

**Table S2.** EXAFS fit results for calcined Pt/CeO<sub>2</sub> samples. EXAFS spectra were extracted in the 2.8-12 Å<sup>-1</sup> k-range while fit was performed in the 1-2.3 Å R-range. S<sub>0</sub><sup>2</sup> was fixed to 0.8 from fit of reference metallic Pt.

| Variable              | Pt/CeO <sub>2</sub> -HS | Pt/CeO <sub>2</sub> -Derived |
|-----------------------|-------------------------|------------------------------|
| R-factor              | 0.014                   | 0.014                        |
| E <sub>0</sub>        | 11.5 ± 1.5              | 11.7 ± 1.4                   |
| CN Pt-O               | 6.4 ± 0.8               | 4.9 ± 0.6                    |
| σ <sup>2</sup> (Pt-O) | 0.0035 ± 0.0015         | 0.0023 ± 0.0012              |
| R (Pt-O)              | 2.004 ± 0.011           | 2.002 ± 0.009                |

**Table S3.** A comparison of activity in CO oxidation reaction on different Pt catalysts in this work.

| Sample                          | Pt (wt%) | Conditions                                                                                                 | T (°C) | Conversion (%) | TOF (s <sup>-1</sup> ) |
|---------------------------------|----------|------------------------------------------------------------------------------------------------------------|--------|----------------|------------------------|
| Pt/CeO <sub>2</sub> -LS         | 0.51     | 5 000 L g <sub>Pt</sub> <sup>-1</sup> h <sup>-1</sup><br>[CO] = 1.2 vol%,<br>[O <sub>2</sub> ] = 9.7 vol%  | 80     | 0.09           | 0.0001                 |
|                                 |          |                                                                                                            | 120    | 0.33           | 0.0007                 |
|                                 |          |                                                                                                            | 150    | 1.02           | 0.002                  |
|                                 |          |                                                                                                            | 180    | 4.51           | 0.006                  |
|                                 |          |                                                                                                            | 200    | 7.94           | 0.013                  |
| Pt/CeO <sub>2</sub> -LS-CO      | 0.51     | 5 000 L g <sub>Pt</sub> <sup>-1</sup> h <sup>-1</sup><br>[CO] = 1.2 vol%,<br>[O <sub>2</sub> ] = 9.7 vol%  | 50     | 21.18          | 0.029                  |
|                                 |          |                                                                                                            | 60     | 47.71          | 0.065                  |
|                                 |          |                                                                                                            | 70     | 81.55          | 0.111                  |
|                                 |          |                                                                                                            | 80     | 95.53          | 0.129                  |
| Pt/CeO <sub>2</sub> -HS         | 0.54     | 5 000 L g <sub>Pt</sub> <sup>-1</sup> h <sup>-1</sup><br>[CO] = 1.2 vol%,<br>[O <sub>2</sub> ] = 9.7 vol%  | 80     | 0.22           | 0.0003                 |
|                                 |          |                                                                                                            | 120    | 0.67           | 0.0009                 |
|                                 |          |                                                                                                            | 150    | 4.17           | 0.006                  |
|                                 |          |                                                                                                            | 180    | 10.60          | 0.014                  |
|                                 |          |                                                                                                            | 200    | 20.22          | 0.027                  |
| Pt/CeO <sub>2</sub> -HS-CO      | 0.54     | 5 000 L g <sub>Pt</sub> <sup>-1</sup> h <sup>-1</sup><br>[CO] = 1.2 vol%,<br>[O <sub>2</sub> ] = 9.7 vol%  | 50     | 13.25          | 0.018                  |
|                                 |          |                                                                                                            | 60     | 24.92          | 0.034                  |
|                                 |          |                                                                                                            | 70     | 40.17          | 0.054                  |
|                                 |          |                                                                                                            | 80     | 73.83          | 0.099                  |
| 3.5%Pt/CeO <sub>2</sub> -HS     | 3.52     | 5 000 L g <sub>Pt</sub> <sup>-1</sup> h <sup>-1</sup><br>[CO] = 1.2 vol%,<br>[O <sub>2</sub> ] = 9.7 vol%  | 80     | 0.06           | 8.17·10 <sup>-5</sup>  |
|                                 |          |                                                                                                            | 120    | 0.52           | 0.0007                 |
|                                 |          |                                                                                                            | 150    | 0.70           | 0.0009                 |
|                                 |          |                                                                                                            | 200    | 3.57           | 0.005                  |
| 3.5%Pt/CeO <sub>2</sub> -HS-CO  | 3.52     | 5 000 L g <sub>Pt</sub> <sup>-1</sup> h <sup>-1</sup><br>[CO] = 1.2 vol%,<br>[O <sub>2</sub> ] = 9.7 vol%  | 80     | 10.74          | 0.014                  |
|                                 |          |                                                                                                            | 100    | 26.73          | 0.035                  |
|                                 |          |                                                                                                            | 120    | 55.04          | 0.074                  |
| Pt/CeO <sub>2</sub> -Derived    | 0.46     | 5 000 L g <sub>Pt</sub> <sup>-1</sup> h <sup>-1</sup><br>[CO] = 1.2 vol%,<br>[O <sub>2</sub> ] = 9.7 vol%  | 80     | 0.52           | 0.0007                 |
|                                 |          |                                                                                                            | 100    | 1.47           | 0.002                  |
|                                 |          |                                                                                                            | 120    | 2.54           | 0.003                  |
|                                 |          |                                                                                                            | 150    | 7.14           | 0.010                  |
|                                 |          |                                                                                                            | 180    | 24.03          | 0.033                  |
|                                 |          |                                                                                                            | 200    | 82.33          | 0.112                  |
| Pt/CeO <sub>2</sub> -Derived-CO | 0.46     | 5 000 L g <sub>Pt</sub> <sup>-1</sup> h <sup>-1</sup><br>[CO] = 1.2 vol%,<br>[O <sub>2</sub> ] = 9.7 vol%  | 50     | 9.82           | 0.013                  |
|                                 |          |                                                                                                            | 60     | 18.53          | 0.025                  |
|                                 |          |                                                                                                            | 70     | 31.82          | 0.043                  |
|                                 |          |                                                                                                            | 80     | 52.67          | 0.072                  |
| Pt/CeO <sub>2</sub> -Derived    | 0.46     | 20 000 L g <sub>Pt</sub> <sup>-1</sup> h <sup>-1</sup><br>[CO] = 1.2 vol%,<br>[O <sub>2</sub> ] = 9.7 vol% | 120    | 0.51           | 0.003                  |
|                                 |          |                                                                                                            | 150    | 3.28           | 0.018                  |
|                                 |          |                                                                                                            | 180    | 8.15           | 0.044                  |
|                                 |          |                                                                                                            | 200    | 22.60          | 0.122                  |
| Pt/CeO <sub>2</sub> -Derived-CO | 0.46     | 20 000 L g <sub>Pt</sub> <sup>-1</sup> h <sup>-1</sup><br>[CO] = 1.2 vol%,<br>[O <sub>2</sub> ] = 9.7 vol% | 50     | 2.59           | 0.014                  |
|                                 |          |                                                                                                            | 60     | 4.34           | 0.024                  |
|                                 |          |                                                                                                            | 70     | 8.80           | 0.048                  |
|                                 |          |                                                                                                            | 80     | 14.85          | 0.081                  |
|                                 |          |                                                                                                            | 100    | 32.62          | 0.178                  |
|                                 |          |                                                                                                            | 120    | 70.39          | 0.385                  |



**Table S4.** Comparison of the CO oxidation activity, expressed as a TOF on a per total Pt basis (mol converted/mol Pt. s), of the Pt/CeO<sub>2</sub> catalysts prepared here with those reported in the literature under analogous reaction conditions. TOFs after stability tests between 200-400°C are reported in brackets.

| Sample                                                              | Pt (wt%) | Pt specie                              | Conditions                                                                                                                                         | Conv. (%)<br>80°C | TOF (s <sup>-1</sup> )<br>80°C | Conv. (%)<br>100°C | TOF (s <sup>-1</sup> )<br>100°C | Ref.         |
|---------------------------------------------------------------------|----------|----------------------------------------|----------------------------------------------------------------------------------------------------------------------------------------------------|-------------------|--------------------------------|--------------------|---------------------------------|--------------|
| Pt/CeO <sub>2</sub> -HS-CO                                          | 0.54     | Cluster<br>(Single Atom)               | 5 000 L g <sub>Pt</sub> <sup>-1</sup> h <sup>-1</sup><br>[CO] = 1.2 vol%,<br>[O <sub>2</sub> ] = 9.7 vol%<br>(Stability up to 300°C - 2 nd cycle)  | 73.83<br>(0.17)   | 0.0992<br>(0.00024)            | 73.83<br>(0.35)    | 0.0992<br>(0.00047)             | Our work     |
| 3.5% Pt/CeO <sub>2</sub> -HS-CO                                     | 3.52     | Cluster<br>(Single atom-PtOx)          | 5 000 L g <sub>Pt</sub> <sup>-1</sup> h <sup>-1</sup><br>[CO] = 1.2 vol%,<br>[O <sub>2</sub> ] = 9.7 vol%<br>(Stability up to 300°C - 2 nd cycle)  | 10.74<br>(3.14)   | 0.0144<br>(0.0041)             | 10.74<br>(4.63)    | 0.0144<br>(0.0062)              | Our work     |
| Pt/CeO <sub>2</sub> -Derived-CO                                     | 0.46     | Cluster<br>(Cluster)                   | 20 000 L g <sub>Pt</sub> <sup>-1</sup> h <sup>-1</sup><br>[CO] = 1.2 vol%,<br>[O <sub>2</sub> ] = 9.7 vol%<br>(Stability up to 300°C - 2 nd cycle) | 14.85<br>(12.62)  | 0.0811<br>(0.0703)             | 32.62<br>(30.25)   | 0.178<br>(0.151)                | Our work     |
| Meso Pt/Ce <sub>0.8</sub> Zr <sub>0.2</sub> O <sub>2</sub>          | 0.40     | Cluster<br>(Cluster)                   | 60 000 mL g <sup>-1</sup> h <sup>-1</sup><br>[CO] = 1 vol%,<br>[O <sub>2</sub> ] = 21 vol%<br>(Stability up to 200°C - 10th cycles)                | 5<br>(5)          | 0.0166<br>(0.0166)             | 10<br>(10)         | 0.0332<br>(0.0332)              | <sup>1</sup> |
| Pt/CeO <sub>2</sub> -TS                                             | 1.00     | Single Atom<br>(Single Atom)           | 200 L g <sup>-1</sup> h <sup>-1</sup><br>[CO] = 1 vol%,<br>[O <sub>2</sub> ] = 10 vol%<br>(Stability up to 350°C - 5 nd cycle)                     | 3<br>(3)          | 0.0133<br>(0.0133)             | 5<br>(5)           | 0.0222<br>(0.0222)              | <sup>2</sup> |
| Pt <sub>1</sub> /CeO <sub>x</sub> /SiO <sub>2</sub> -H <sub>2</sub> | 0.40     | Single Atom<br>(Single Atom)           | 20 000 mL g <sup>-1</sup> h <sup>-1</sup><br>[CO] = 1 vol%,<br>[O <sub>2</sub> ] = 4 vol%<br>(Stability up to 200°C - 4 th cycle)                  | 3<br>(3)          | 0.0022<br>(0.0033)             | 8<br>(8)           | 0.0088<br>(0.0088)              | <sup>3</sup> |
| Pt-SA-Ce-MOF                                                        | 0.12     | Single Atom<br>(Single Atom)           | 120 000 mL g <sup>-1</sup> h <sup>-1</sup><br>[CO] = 0.3 vol%,<br>[O <sub>2</sub> ] = 7.5 vol%<br>(Stability up to 200°C - 10 <sup>th</sup> cycle) | 8<br>(8)          | 0.0120<br>(0.0120)             | 13<br>(13)         | 0.0195<br>(0.0195)              | <sup>4</sup> |
| Pt <sub>1</sub> Pt <sub>NP</sub> /CeO <sub>2</sub> -19% SA          | 0.71     | Single Atom + NP<br>(Single Atom + NP) | 120 000 mL g <sup>-1</sup> h <sup>-1</sup><br>[CO] = 0.3 vol%,<br>[O <sub>2</sub> ] = 7.5 vol%<br>(Stability up to 350°C - 7 th cycle)             | 1.5<br>(1.5)      | 0.0028<br>(0.0028)             | 3<br>(3)           | 0.0056<br>(0.0056)              | <sup>5</sup> |

**Table S5.** Comparison of the CO oxidation activity, expressed as a TOF on a per total Pt basis (mol converted/mol Pt. s), of the Pt/CeO<sub>2</sub> catalysts prepared here with those reported in the literature under analogous reaction conditions. TOFs after stability tests at 500°C are reported in brackets.

| Sample                                 | Pt (wt%) | Pt specie                     | Conditions                                                                                                                                         | Conv. (%)<br>80°C | TOF (s <sup>-1</sup> )<br>80°C | Reference    |
|----------------------------------------|----------|-------------------------------|----------------------------------------------------------------------------------------------------------------------------------------------------|-------------------|--------------------------------|--------------|
| Pt/CeO <sub>2</sub> -HS-CO             | 0.54     | Cluster<br>(Single atom)      | 5 000 L g <sub>Pt</sub> <sup>-1</sup> h <sup>-1</sup><br>[CO] = 1.2 vol%,<br>[O <sub>2</sub> ] = 9.7 vol%<br>(Stability up to 500°C - 2 nd cycle)  | 73.83<br>(0.097)  | 0.0992<br>(0.00013)            | Our work     |
| 3.5 % Pt/CeO <sub>2</sub> -HS-CO       | 3.52     | Cluster<br>(Single atom-PtOx) | 5 000 L g <sub>Pt</sub> <sup>-1</sup> h <sup>-1</sup><br>[CO] = 1.2 vol%,<br>[O <sub>2</sub> ] = 9.7 vol%<br>(Stability up to 500°C - 2 nd cycle)  | 10.74<br>(0.89)   | 0.0144<br>(0.0012)             | Our work     |
| Pt/CeO <sub>2</sub> -Derived-CO        | 0.46     | Cluster<br>(Cluster)          | 20 000 L g <sub>Pt</sub> <sup>-1</sup> h <sup>-1</sup><br>[CO] = 1.2 vol%,<br>[O <sub>2</sub> ] = 9.7 vol%<br>(Stability up to 500°C - 2 nd cycle) | 14.85<br>(4.62)   | 0.0811<br>(0.0250)             | Our work     |
| Pt-NP<br>(Pt/CeO <sub>2</sub> )        | 0.94     | Cluster<br>(Single atom)      | 60 000 L g <sub>Pt</sub> <sup>-1</sup> h <sup>-1</sup><br>[CO] = 1000 ppm,<br>[O <sub>2</sub> ] = 8 vol%<br>(Stability up to 500°C - 2 nd cycle)   | 60<br>(< 1)       | 0.0798<br>(< 0.0013)           | <sup>6</sup> |
| Pt <sub>AT</sub> -CeO <sub>2</sub> -CO | 1.00     | Cluster<br>(Single atom)      | 300 L g <sup>-1</sup> h <sup>-1</sup><br>[CO] = 1 vol%,<br>[O <sub>2</sub> ] = 5 vol%<br>(Stability up to 500°C - 2 nd cycle)                      | 37<br>(< 1)       | 0.2460<br>(<0.0066)            | <sup>7</sup> |
| Pt/CeO <sub>2</sub> -S                 | 1.00     | Single Atom<br>(Single Atom)  | 200 000 mL g <sup>-1</sup> h <sup>-1</sup><br>[CO] = 0.4 vol%,<br>[O <sub>2</sub> ] = 10 vol%<br>(Stability up to 500°C - 2 nd cycle)              | 5<br>(5)          | 0.0090<br>(0.0090)             | <sup>8</sup> |

**Table S6.** Comparison of the CO oxidation activity, expressed as a TOF on a per total Pt basis (mol converted/mol Pt. s), of the Pt/CeO<sub>2</sub> catalysts prepared here with those reported in the literature under analogous reaction conditions. TOFs after stability tests between 200-400°C are reported in brackets.

| T (°C) | Sample A / B                                 | Pt (wt%) | Conditions                                                                                                 | Conv. (%) | TOF (s <sup>-1</sup> ) | X-times | Refs.     |
|--------|----------------------------------------------|----------|------------------------------------------------------------------------------------------------------------|-----------|------------------------|---------|-----------|
| 200    | K <sub>0</sub> -Pt@MFI<br>600-H <sub>2</sub> | 0.2      | 15 900 L g <sub>Pt</sub> <sup>-1</sup> h <sup>-1</sup><br>[CO] = 1.3 vol%,<br>[O <sub>2</sub> ] = 8.2 vol% | 9.37      | 0.0436                 | 4.6     | 9         |
|        | K <sub>0</sub> -Pt@MFI<br>200-H <sub>2</sub> | 0.2      | 15 900 L g <sub>Pt</sub> <sup>-1</sup> h <sup>-1</sup><br>[CO] = 1.3 vol%,<br>[O <sub>2</sub> ] = 8.2 vol% | 2.04      | 0.0095                 |         |           |
| 190    | K <sub>0.6</sub> -Pt@MFI                     | 0.2      | 15 900 L g <sub>Pt</sub> <sup>-1</sup> h <sup>-1</sup><br>[CO] = 1.3 vol%,<br>[O <sub>2</sub> ] = 8.2 vol% | 15.98     | 0.0729                 | 3       | 9         |
|        | K <sub>0</sub> -Pt@MFI                       | 0.2      | 15 900 L g <sub>Pt</sub> <sup>-1</sup> h <sup>-1</sup><br>[CO] = 1.3 vol%,<br>[O <sub>2</sub> ] = 8.2 vol% | 5.13      | 0.0234                 |         |           |
| 80     | Pt/CeO <sub>2</sub> -HS-CO                   | 0.5      | 5 000 L g <sub>Pt</sub> <sup>-1</sup> h <sup>-1</sup><br>[CO] = 1.2 vol%,<br>[O <sub>2</sub> ] = 9.7 vol%  | 73.83     | 0.0992                 | 330     | This work |
|        | Pt/CeO <sub>2</sub> -HS                      | 0.5      | 5 000 L g <sub>Pt</sub> <sup>-1</sup> h <sup>-1</sup><br>[CO] = 1.2 vol%,<br>[O <sub>2</sub> ] = 9.7 vol%  | 0.041     | 0.0003                 |         |           |
| 120    | 3.5%Pt/CeO <sub>2</sub> -HS                  | 0.2      | 5 000 L g <sub>Pt</sub> <sup>-1</sup> h <sup>-1</sup><br>[CO] = 1.2 vol%,<br>[O <sub>2</sub> ] = 9.7 vol%  | 55.04     | 0.0734                 | 107     | This work |
|        | 3.5%Pt/CeO <sub>2</sub> -HS-CO               | 0.2      | 5 000 L g <sub>Pt</sub> <sup>-1</sup> h <sup>-1</sup><br>[CO] = 1.2 vol%,<br>[O <sub>2</sub> ] = 9.7 vol%  | 0.515     | 0.00069                |         |           |
| 120    | Pt/CeO <sub>2</sub> -Derived-CO              | 0.5      | 20 000 L g <sub>Pt</sub> <sup>-1</sup> h <sup>-1</sup><br>[CO] = 1.2 vol%,<br>[O <sub>2</sub> ] = 9.7 vol% | 70.39     | 0.3849                 | 120     | This work |
|        | K <sub>0</sub> -Pt@MFI                       | 0.2      | 15 900 L g <sub>Pt</sub> <sup>-1</sup> h <sup>-1</sup><br>[CO] = 1.3 vol%,<br>[O <sub>2</sub> ] = 8.2 vol% | 0.676     | 0.0032                 |         | 9         |

**Table S7.** Energy of interaction between Pt<sub>10</sub> clusters of different morphology and CeO<sub>2</sub> surfaces ( $E_{\text{int}}$ , in eV) and total atomic charge on the supported Pt<sub>10</sub> clusters ( $q_{\text{Pt}_{10}}$ , in e).

| Morphology       | CeO <sub>2</sub> (111) |                          | CeO <sub>2</sub> -V   |                          |
|------------------|------------------------|--------------------------|-----------------------|--------------------------|
|                  | $E_{\text{int}}$ (eV)  | $q_{\text{Pt}_{10}}$ (e) | $E_{\text{int}}$ (eV) | $q_{\text{Pt}_{10}}$ (e) |
| 1L               | -6.503                 | 0.680                    | -6.00                 | 0.631                    |
| 2L               | -6.946                 | 0.669                    | -6.345                | 0.638                    |
| 3L               | -5.691                 | 0.658                    | -8.891                | 0.690                    |
| 2Pt <sub>5</sub> | -4.320                 | 0.680                    | -8.346                | 1.321                    |

**Table S8.** Energy of interaction between Pt<sub>10</sub>/CeO<sub>2</sub> and O<sub>2</sub> to form partly oxidized Pt<sub>10</sub>O<sub>x</sub>/CeO<sub>2</sub> systems (E<sub>int</sub>(O<sub>2</sub>), in eV). Total atomic charge on the Pt<sub>10</sub> cluster (qPt<sub>10</sub>) is given in e.

| System                                   | CeO <sub>2</sub> (111)                  |                       | CeO <sub>2</sub> -V                     |                       |
|------------------------------------------|-----------------------------------------|-----------------------|-----------------------------------------|-----------------------|
|                                          | E <sub>int</sub> (O <sub>2</sub> ) (eV) | qPt <sub>10</sub> (e) | E <sub>int</sub> (O <sub>2</sub> ) (eV) | qPt <sub>10</sub> (e) |
| Pt <sub>10</sub> O <sub>2</sub> - corner |                                         |                       | -1.747                                  | 1.690                 |
| Pt <sub>10</sub> O <sub>2</sub> - {111}  | -2.270                                  | 2.157                 | -2.238                                  | 2.245                 |
| Pt <sub>10</sub> O <sub>2</sub> - {100}  | -3.228                                  | 2.236                 |                                         |                       |
| Pt <sub>10</sub> O <sub>6</sub>          | -9.156                                  | 5.385                 | -7.997                                  | 5.556                 |
| Pt <sub>10</sub> O <sub>8</sub>          | -9.905                                  | 6.068                 | -7.873                                  | 7.096                 |
| Pt <sub>10</sub> O <sub>10</sub>         | -11.364                                 | 8.478                 | -10.587                                 | 8.753                 |

**Table S9.** Parameters used for XPS fitting of Pt4f for all samples in all conditions.

| Component        | Position (eV) | FWHM |
|------------------|---------------|------|
| *Pt <sup>0</sup> | 71.4          | 2.0  |
|                  | 74.7          | 2.0  |
| Pt <sup>+2</sup> | 72.9          | 2.0  |
|                  | 76.2          | 2.0  |
| Pt <sup>+4</sup> | 74.6          | 2.0  |
|                  | 77.9          | 2.0  |

\*Pt<sup>0</sup> in the case of Pt/Derived-CO treated was corrected to 71.2 eV position.

## References:

1. Yang, X. *et al.* Large-Pore Mesoporous CeO<sub>2</sub>–ZrO<sub>2</sub> Solid Solutions with In-Pore Confined Pt Nanoparticles for Enhanced CO Oxidation. *Small* **15**, (2019).
2. Jiang, D. *et al.* Tailoring the Local Environment of Platinum in Single-Atom Pt<sub>1</sub>/CeO<sub>2</sub> Catalysts for Robust Low-Temperature CO Oxidation. *Angewandte Chemie International Edition* **60**, 26054–26062 (2021).
3. Li, X. *et al.* Functional CeO<sub>x</sub> nanoglues for robust atomically dispersed catalysts. *Nature* **611**, 284–288 (2022).
4. Guo, S., Zhao, Y., Wang, C., Jiang, H. & Cheng, G. J. A Single-Atomic Noble Metal Enclosed Defective MOF via Cryogenic UV Photoreduction for CO Oxidation with Ultrahigh Efficiency and Stability. *ACS Appl Mater Interfaces* **12**, 26068–26075 (2020).
5. Fu, N. *et al.* Controllable Conversion of Platinum Nanoparticles to Single Atoms in Pt/CeO<sub>2</sub> by Laser Ablation for Efficient CO Oxidation. *J Am Chem Soc* **145**, 9540–9547 (2023).
6. Maurer, F. *et al.* Tracking the formation, fate and consequence for catalytic activity of Pt single sites on CeO<sub>2</sub>. *Nat Catal* **3**, 824–833 (2020).
7. Zhang, Z. *et al.* Memory-dictated dynamics of single-atom Pt on CeO<sub>2</sub> for CO oxidation. *Nat Commun* **14**, 2664 (2023).
8. Nie, L. *et al.* Activation of surface lattice oxygen in single-atom Pt/CeO<sub>2</sub> for low-temperature CO oxidation. *Science (1979)* **358**, 1419–1423 (2017).
9. Bohigues, B. *et al.* Highly stable subnanometric Pt clusters in all silica K-doped zeolites: implications for the CO oxidation reaction. *Submitted* (2024).
